# Supplementary material for: EIF3B stabilizes PCNA by counteracting SYVN1-mediated ubiquitination to serve as a promotor in cholangiocarcinoma
Source: publisher site journal article supplement (doi:10.18632/aging.205759), 2024-04-29
Supplement: Supplementary file [file aging-v16i8-205759-supplementary-material-SD2.pdf]

## SUPPLEMENTARY TABLES

**Supplementary Table 1. Antibodies used in western blot and IHC.**

| <b>Primary antibodies</b> | <b>Dilution in WB</b>  | <b>Source species</b> | <b>Company</b> | <b>Catalog No.</b> |
|---------------------------|------------------------|-----------------------|----------------|--------------------|
| EIF3B                     | 1:1000                 | Rabbit                | abcam          | ab124778           |
| Bcl-2                     | 1:3000                 | Rabbit                | Proteintech    | 12789-1-AP         |
| Caspase-3                 | 1:2000                 | Mouse                 | Proteintech    | 66470-2-Ig         |
| Survivin                  | 1:2000                 | Rabbit                | novus          | 10508-1-AP         |
| CDCA5                     | 1:1000                 | Rabbit                | abcam          | ab192237           |
| FAM111B                   | 1:1000                 | Rabbit                | thermo         | PA5-28529          |
| MCM8                      | 1:1000                 | Rabbit                | abcam          | ab191914           |
| PCNA                      | 1:1000                 | Mouse                 | abcam          | ab29               |
| P21                       | 1:750                  | Rabbit                | Proteintech    | 10355-1-AP         |
| SYVN1                     | 1:50/1:2000            | Rabbit                | Proteintech    | 13473-1-AP         |
| Ubiquitin                 | 1:1000                 | Mouse                 | Santa Cruz     | sc-47721           |
| GAPDH                     | 1:3000                 | Rabbit                | Bioworld       | AP0063             |
| DYKDDDDK Tag              | 1:50/1:1000            | Rabbit                | CST            | 14793              |
| Secondary antibody        | Dilution               |                       | Company        | Catalog No.        |
| Goat Anti-Rabbit          | 1:3000                 |                       | Beyotime       | A0208              |
| Goat Anti- Mouse          | 1:3000                 |                       | Beyotime       | A0216              |
| <b>Primary antibodies</b> | <b>Dilution in IHC</b> | <b>Source species</b> | <b>Company</b> | <b>Catalog No.</b> |
| EIF3B                     | 1:50                   | Rabbit                | abcam          | <b>ab124778</b>    |
| PCNA                      | 1:100                  | Rabbit                | Proteintech    | 10205-2-AP         |
| Ki67                      | 1:200                  | Rabbit                | abcam          | Ab16667            |
| Secondary antibody        | Dilution               |                       | Company        | Catalog No.        |
| Goat Anti-Rabbit          | 1:400                  |                       | abcam          | A6721              |

**Supplementary Table 2. Primers used in qRT-PCR.**

| <b>Gene</b> | <b>Forward primer sequence (5'-3')</b> | <b>Reverse primer sequence (5'-3')</b> |
|-------------|----------------------------------------|----------------------------------------|
| EIF3B       | CCTGAAGAGGATGGGAAGACA                  | AAGAGGTTGACCCGGAATG                    |
| FANCA       | GTTTGAGCATAACGGGGAACA                  | TGGCAGTAGGTGGAGTACAGAG                 |
| IPO5        | GCCATCACTGAAGCACATCG                   | TTCCCAACAGCCAGACCAAT                   |
| BARD1       | ATCCTCAGTAGAAAGCCCAAGC                 | TCAGAATCGGGTCTCGCATG                   |
| LIG1        | ATGGTGGAGACGCTGAGCAA                   | TGGTTGAGGCTGAGGTAGAGGA                 |
| MCM8        | ATGGCTTTTCTTTGTGCTGC                   | CCAGTCCATCGTAACTGTGAGA                 |
| MDM2        | GGTGAGGAGCAGGCAAATGT                   | CGAAGCTGGAATCTGTGAGGT                  |
| HSDL2       | AGTCCACCACTGAACCTAAATCC                | TCTGCCATTCCAAGCACATAC                  |
| BRCA1       | TGGCAACATAACCATCTTCAACC                | TGTCAATTCTGGCTTCTCCCT                  |
| CDCA5       | CCGAGCATCCTCCCTGAAAT                   | CATGGGCCACGATCCTCTTTA                  |
| ERCC6L      | AAAAGTCAAGCAACCCAGAGG                  | GTAAAGGCACAAGTCGTATCCA                 |
| CCNA2       | AGCCTGCGTTCACCATTCA                    | GGGCATCTTCACGCTCTATTTT                 |
| PCNA        | GGCGTGAACCTCACCAGTATGT                 | CGTTATCTTCGGCCCTTAGTGTA                |
| CCNB1       | AACTTTGGTCTGGGTCGGC                    | TGCTGCAATTTGAGAAGGAGG                  |
| CHAF1A      | CAGTGATGTCGTTCATCGTGG                  | TGAGTGCCGTCTTCTTATTCC                  |
| DDB2        | CAGGACCCTCCACCAGCATAA                  | GCCACGCCAAGGATGTAGCC                   |
| RPA2        | ATTGTGGGGATCATCAGACATG                 | CAGTGTTTTCACTGCTGGTGTC                 |
| SKP2        | ATAGAAGTGTCCACCCTCCACG                 | CACCCAGAAAGGTTAAGTCGC                  |
| TMPO        | CCCCTATGAAGCATCTACACCA                 | GCCAAGGGAACATACTTAGGAAC                |
| FAM111B     | CCAGACAATTCCCAGGATTAGA                 | TAGCATACCGCCTACCCAGA                   |
| GAPDH       | TGACTTCAACAGCGACACCCA                  | CACCCTGTTGCTGTAGCCAAA                  |
